# Supplementary material for: Evaluation of the Analgesic Effect of High-Cannabidiol-Content Cannabis Extracts in Different Pain Models by Using Polymeric Micelles as Vehicles
Source: MDPI journal article supplement (doi:10.3390/molecules28114299), 2023-05-24
Supplement: s1 [file s1]

## Supplementary Materials

# Evaluation of the Analgesic Effect of High-cannabidiol-content Cannabis Extracts in Different Pain Models by Using Polymeric Micelles as Vehicles

Yoreny Román-Vargas <sup>1,\*</sup>, Julián David Porras-Arguello <sup>2</sup>, Lucas Blandón-Naranjo <sup>3</sup>, León Darío Pérez-Pérez <sup>2</sup> and Dora María Benjumea <sup>1,\*</sup>

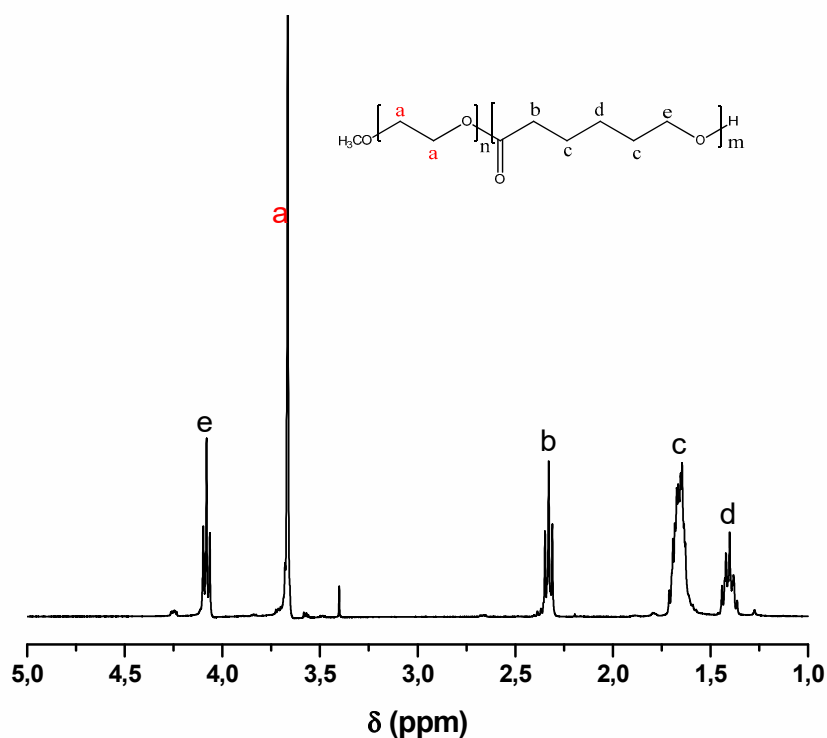

Figure S1. <sup>1</sup>H NMR spectrum of PEG-b-PCL used as precursor for the micellar vehicles.

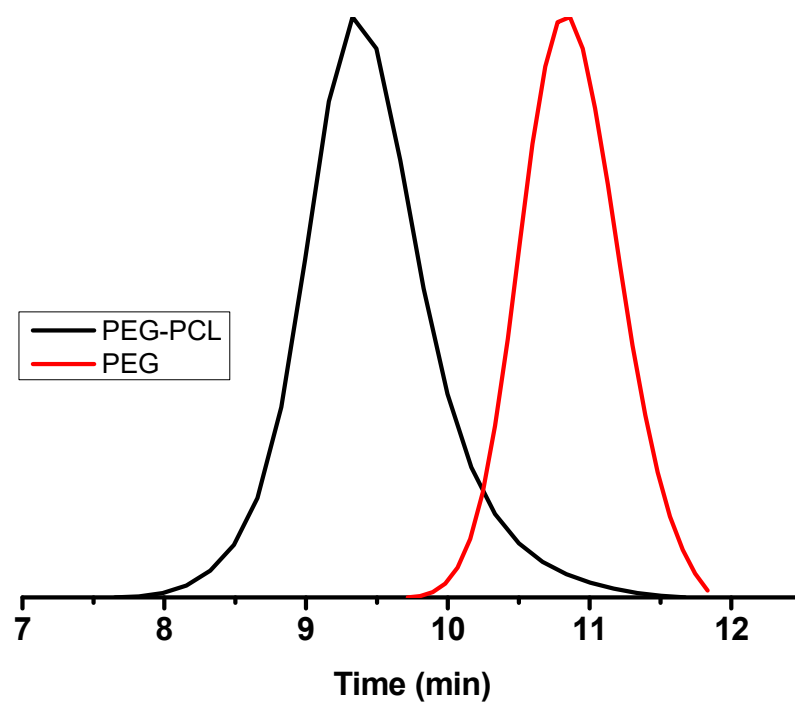

Figure S2. GPC Chromatogram of amphiphilic PEG-b-PCL and its initiator m-PEG.

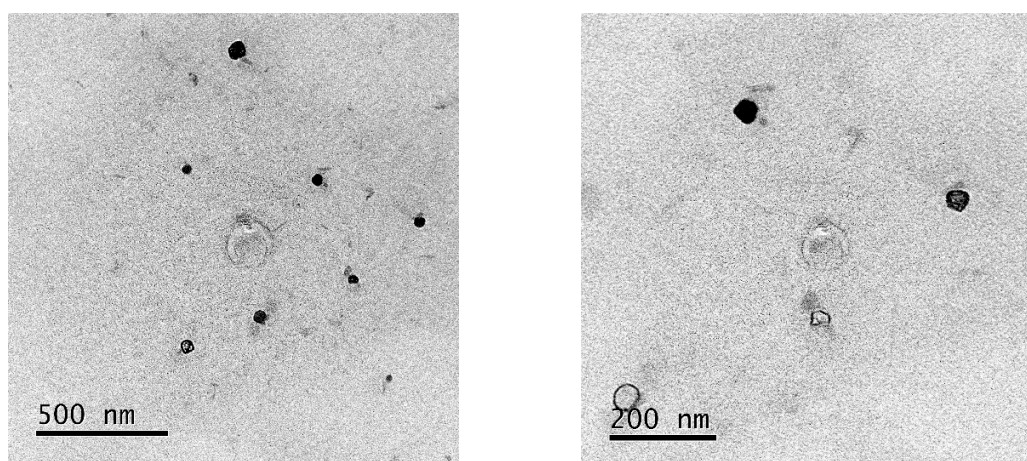

Figure S3. Characterization of formulation CBD/PMs by TEM. The images show two different magnifications.

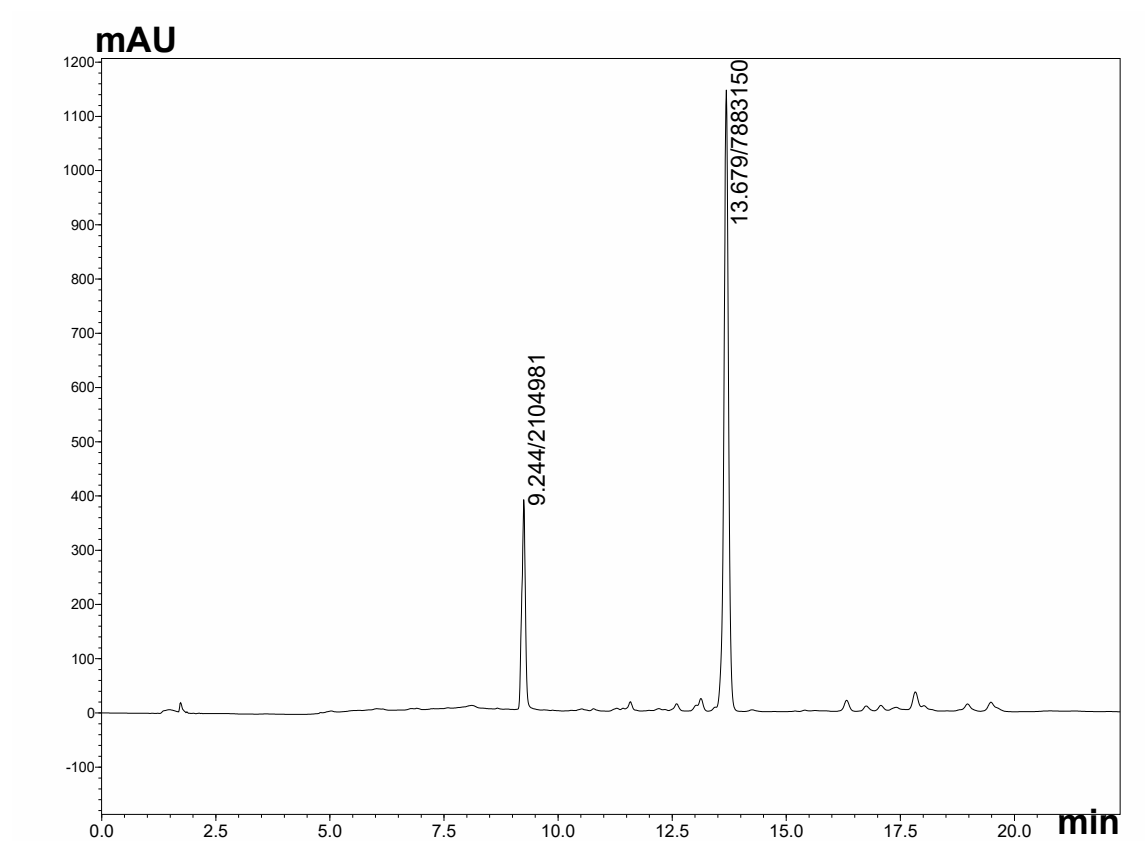

Figure S4 (a). HPLC chromatogram for the cannabis extract before encapsulation. Quantitative amounts of THC: 1.08%, and CBD: 31.65%.

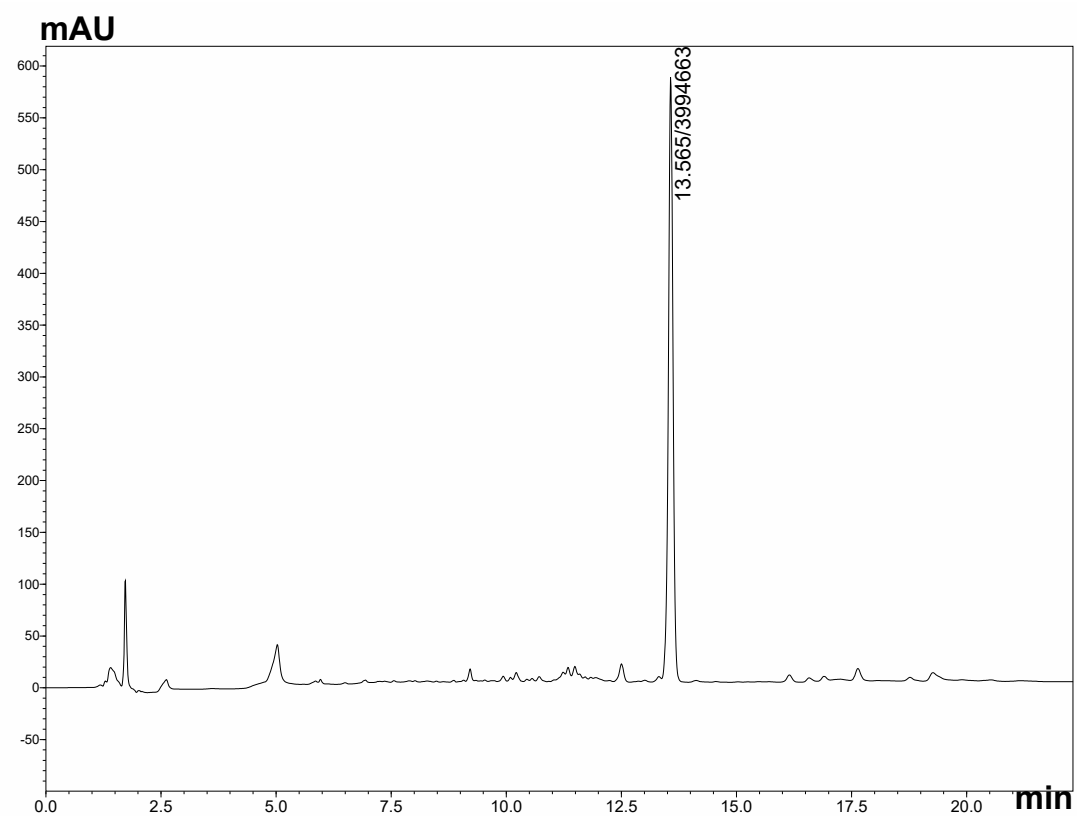

Figure S4 (b). HPLC chromatogram for the encapsulates cannabis extract. Quantitative amounts of: CBD: 9.2%
